# Supplementary material for: Injectable pH and Thermo-Responsive Hydrogel Scaffold with Enhanced Osteogenic Differentiation of Preosteoblasts for Bone Regeneration
Source: MDPI journal article supplement (doi:10.3390/pharmaceutics15092270), 2023-09-02
Supplement: s1 [file s1]

# Injectable pH and Thermo-Responsive Hydrogel Scaffold with Enhanced Osteogenic Differentiation of Preosteoblasts for Bone Regeneration

Jasmine L. King <sup>1</sup>, Roopali Shirvastava <sup>2</sup>, Pooja D. Shah <sup>2</sup>, Panita Maturavongsadit <sup>2</sup>, and S. Rahima Benhabbour <sup>1,2,\*</sup>

<sup>1</sup> Division of Pharmacoengineering and Molecular Pharmaceutics, UNC Eshelman School of Pharmacy, University of North Carolina at Chapel Hill, Chapel Hill, NC 27599, USA; jking116@email.unc.edu

<sup>2</sup> Joint Department of Biomedical Engineering, North Carolina State University and The University of North Carolina at Chapel Hill, Chapel Hill, NC 27599, USA; roopalishah1@email.unc.edu (R.S.); pdshah1@email.unc.edu (P.D.S.); panita.maturavong@gmail.com (P.M.)

\* Correspondence: benhabbs@email.unc.edu Tel.: +1-919-843-6142

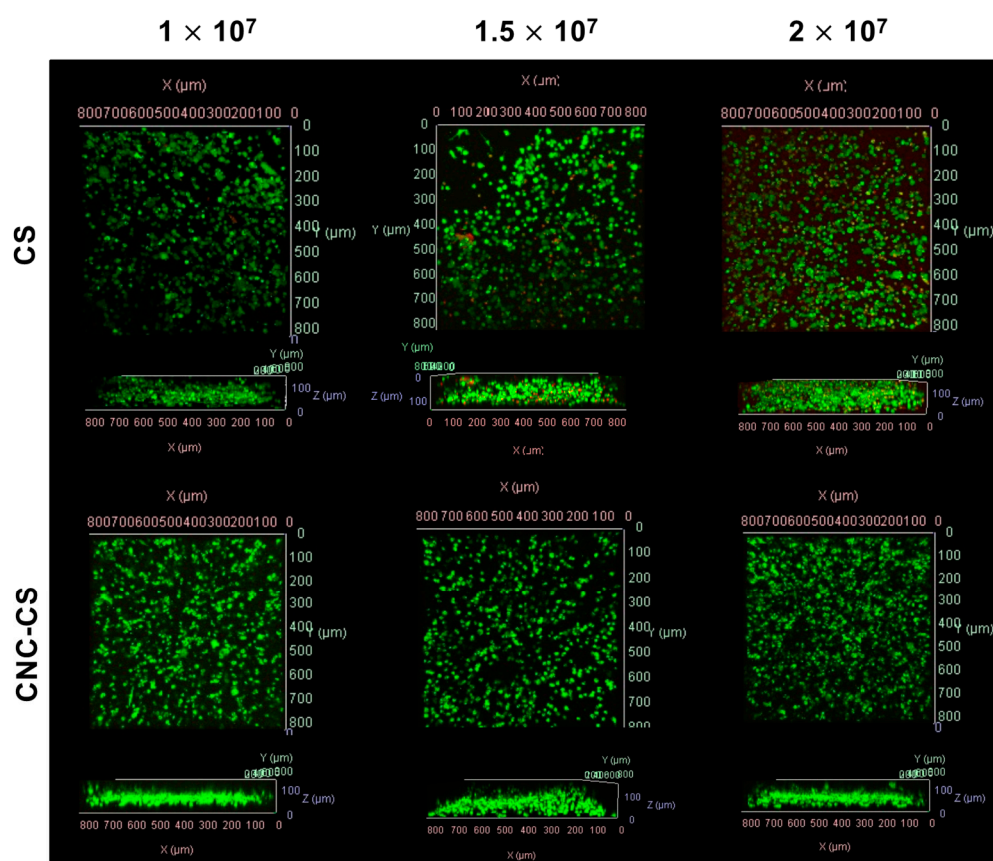

**Supplementary Figure S1.** In vitro cell viability of MC3T3-E1 CS and CNC-CS hydrogels evaluated after 24 h incubation using LIVE/DEAD® Viability/Cytotoxicity kit. Confocal fluorescent images of MC3T3-E1 cells ( $10^7 - 2 \times 10^7$  in CS and CNC-CS hydrogels ( $n = 3$ ; 50  $\mu$ L samples).

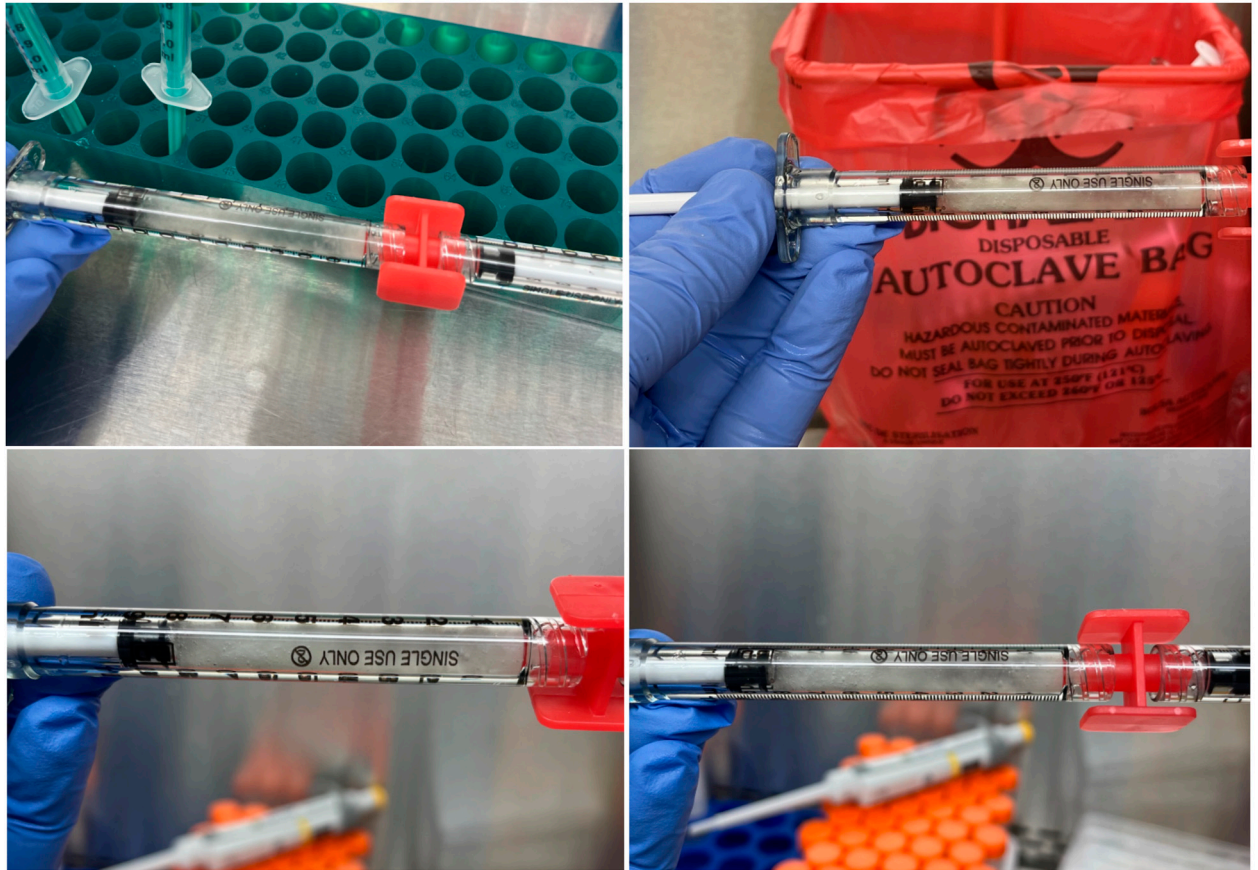

**Supplementary Figure S2.** Non-uniform distribution of MC3T3-E1 cells within CNC-CS hydrogels at high cell seeding densities. Luer-lock syringes of MC3T3-E1 cells encapsulated in CS and CNC-CS hydrogels at cell densities of  $10^7 - 2 \times 10^7$ .

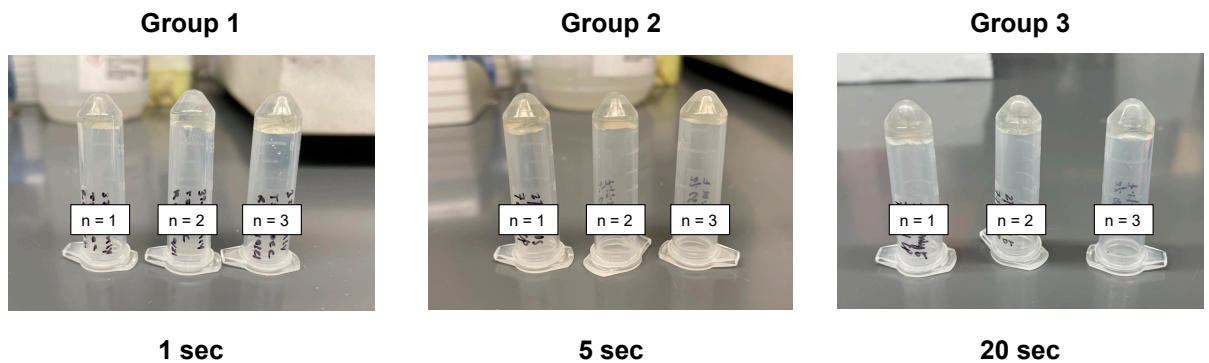

| Group | Result<br>(Gelation = Yes; No Gelation = No) |
|-------|----------------------------------------------|
| 1     | No                                           |
| 2     | Yes                                          |
| 3     | Yes                                          |

**Supplementary Figure S3.** Inversion test for in situ forming CS hydrogel. Inversion test to evaluate hydrogel gelation under temperature-controlled conditions (37°C): Group 1) 1 second at 37°C, Group 2) 5 seconds at 37°C, and Group 3) 20 seconds at 37°C.

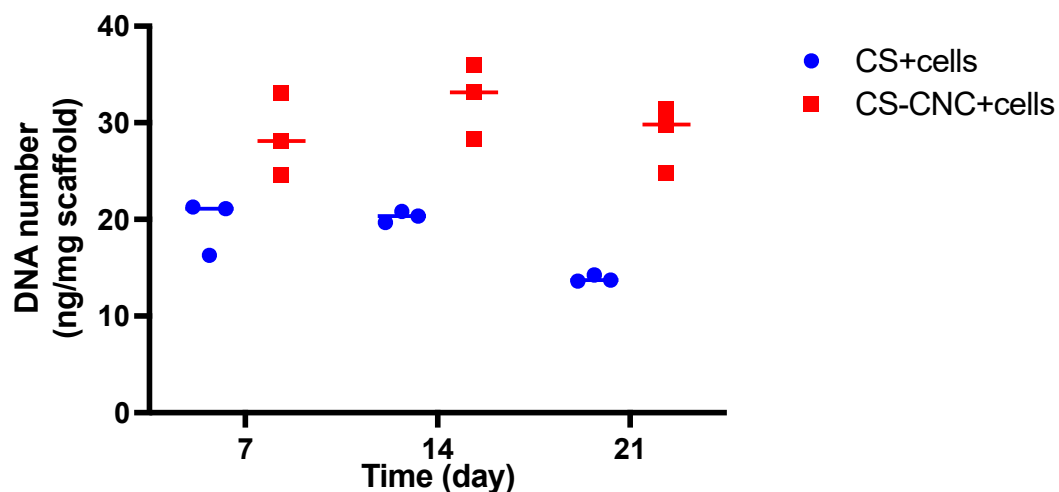

**Supplementary Figure S4.** Cell proliferation of MC3T3-E1 cells in CS and CS-CNC hydrogels over 21-day study period. Graphical representation of median DNA number of 5 million MC3T3-E1 cells in 1 mL CS and CS-CNC hydrogel.

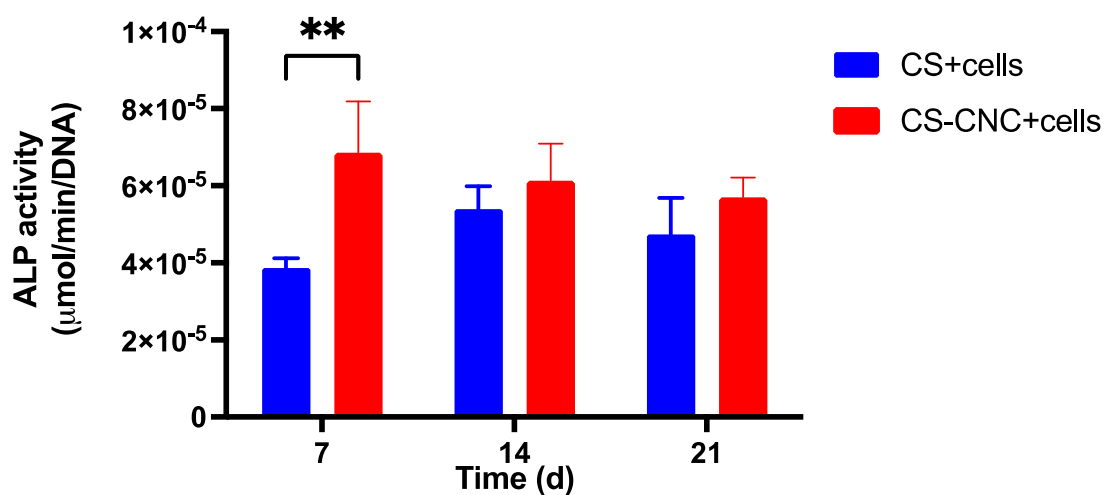

**Supplementary Figure S5.** ALP activity of cell-laden CS and CS-CNC hydrogels over 21-day study period. Graphical representation of 5 million MC3T3-E1 cells in 1 mL CS hydrogel and CS-CNC hydrogel normalized to DNA number (\*\* indicates  $p < 0.005$ ).

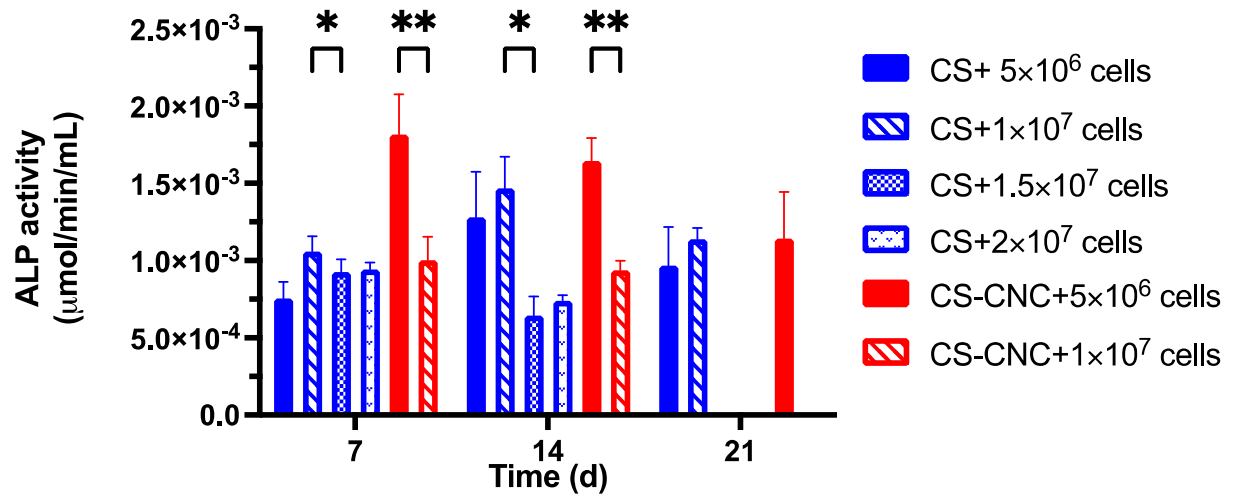

**Supplementary Figure S6.** ALP activity of cell-laden CS and CS-CNC hydrogels over 21-day study period. Graphical representation of 5, 10, and 20 million MC3T3-E1 cells in 1 mL CS hydrogel and 5 and 10 million MC3T3-E1 cells in 1 mL CS-CNC hydrogel (\* indicates  $p < 0.05$  and \*\* indicates  $p < 0.005$ ). There were no intact scaffolds at day 7 for 15 to 20 million CS-CNC hydrogels (no data included).
